# Supplementary material for: Aromatic Polyketides from a Symbiotic Strain Aspergillus fumigatus D and Characterization of Their Biosynthetic Gene D8.t287
Source: PubMed Central journal article supplement (PMC7344599; doi:10.3390/md18060324), 2020-06-20
Supplement: marinedrugs-18-00324-s001.pdf [file marinedrugs-18-00324-s001.pdf]

---

*Supplementary Materials for*

# **Aromatic Polyketides from a Symbiotic Strain *Aspergillus fumigatus* D and Characterization of Their Biosynthetic Gene *D8.t287***

Yi Hua <sup>1</sup>, Rui Pan <sup>1</sup>, Xuelian Bai <sup>2</sup>, Bin Wei <sup>1</sup>, Jianwei Chen <sup>1</sup>, Hong Wang <sup>1,\*</sup> and Huawei Zhang <sup>1,\*</sup>

|                                                                                            |    |
|--------------------------------------------------------------------------------------------|----|
| <b>Figure S1.</b> Isolation procedure of compounds 1-8                                     | 1  |
| <b>Figure S2.</b> Screening resistance marker of strain D                                  | 1  |
| <b>Figure S3.</b> PCR verification of target genes LB and RB in constructed vector         | 1  |
| <b>Figure S4.</b> Colony morphology of positive transformant and PCR verification          | 1  |
| <b>Figure S5.</b> PCR identification results of mutant strain $\Delta$ HY44                | 2  |
| <b>Figure S6.</b> <sup>1</sup> H NMR Spectrum of compound 1 in CDCl <sub>3</sub>           | 3  |
| <b>Figure S7.</b> <sup>1</sup> H NMR Spectrum of compound 2 in DMSO- <i>d</i> <sub>6</sub> | 4  |
| <b>Figure S8.</b> <sup>1</sup> H NMR Spectrum of compound 3 in CDCl <sub>3</sub>           | 5  |
| <b>Figure S9.</b> <sup>1</sup> H NMR Spectrum of compound 4 in CDCl <sub>3</sub>           | 6  |
| <b>Figure S10.</b> <sup>1</sup> H NMR Spectrum of compound 5 in CDCl <sub>3</sub>          | 7  |
| <b>Figure S11.</b> <sup>1</sup> H NMR Spectrum of compound 6 in CDCl <sub>3</sub>          | 8  |
| <b>Figure S12.</b> <sup>1</sup> H NMR Spectrum of compound 7 in CDCl <sub>3</sub>          | 9  |
| <b>Figure S13.</b> <sup>1</sup> H NMR Spectrum of compound 8 in CDCl <sub>3</sub>          | 11 |
| <b>Table S1.</b> Primers and its sequences of PCR                                          | 2  |
| <b>Table S2.</b> Conditions of PCR reaction                                                | 2  |
| <b>Table S3.</b> Comparison of <sup>1</sup> H NMR spectral data of compound 1              | 3  |
| <b>Table S4.</b> Comparison of <sup>1</sup> H NMR spectral data of compound 2              | 4  |
| <b>Table S5.</b> Comparison of <sup>1</sup> H NMR spectral data of compound 3              | 5  |
| <b>Table S6.</b> Comparison of <sup>1</sup> H NMR spectral data of compound 4              | 6  |
| <b>Table S7.</b> Comparison of <sup>1</sup> H NMR spectral data of compound 5              | 7  |

---

|                                                                                     |    |
|-------------------------------------------------------------------------------------|----|
| <b>Table S8.</b> Comparison of $^1\text{H}$ NMR spectral data of compound <b>6</b>  | 8  |
| <b>Table S9.</b> Comparison of $^1\text{H}$ NMR spectral data of compound <b>7</b>  | 10 |
| <b>Table S10.</b> Comparison of $^1\text{H}$ NMR spectral data of compound <b>8</b> | 11 |



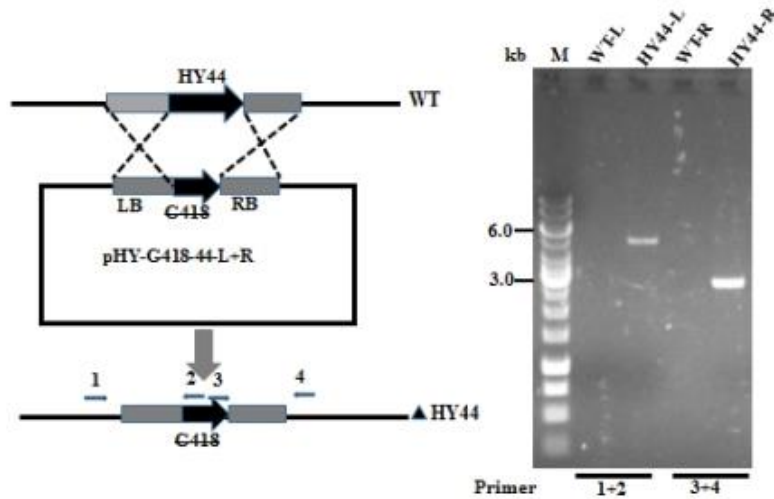

**Figure S5.** PCR identification of mutant strain  $\Delta$ HY44  
(M: Marker; WT: wild strain;  $\Delta$ HY44: mutant strain)

**Table S1.** Conditions for PCR reaction

| Reagent                       | V ( $\mu$ L) |
|-------------------------------|--------------|
| 5 $\times$ PCR Buffer         | 10           |
| dNTP Mixture                  | 4            |
| P1/ P2 primers                | 1            |
| Template                      | 1            |
| Primer STAR HS DNA polymerase | 1            |
| ddH <sub>2</sub> O            | 33           |
| Total                         | 50           |

**Table S2.** Primers and their sequences for PCR verification

| Primers   | Sequences                                       |
|-----------|-------------------------------------------------|
| HY44-L-1  | TTGAACATCGCGCAGTAATGCC                          |
| HY44-L-2  | GAATTAATGGTACCGAGCTCGAATTAGACACATTTGGGCAAAGTGCG |
| HY44-R-1  | GTTTAGAGGTAATCCTCCC GGGACCTCGCTGTTGTGTGCTTTTG   |
| HY44-R-2  | CGATCCTAGAACTAGTGGATCCCGTATACTATCGCGAAGAGAAGC   |
| P-check-F | GGCAGGATATATTGTGGTGTAAC                         |
| P-check-R | CTCTCAGTGCGGATCAGTC                             |
| P1        | GGCAGGATATATTGTGGTGTAAC                         |
| P2        | GCCTGCGTTC TACTACTAGCACG                        |
| P3        | GCATTCGCCATT CAGGCTGC                           |
| P4        | CGTGACCGATAGCTTCAACACC                          |

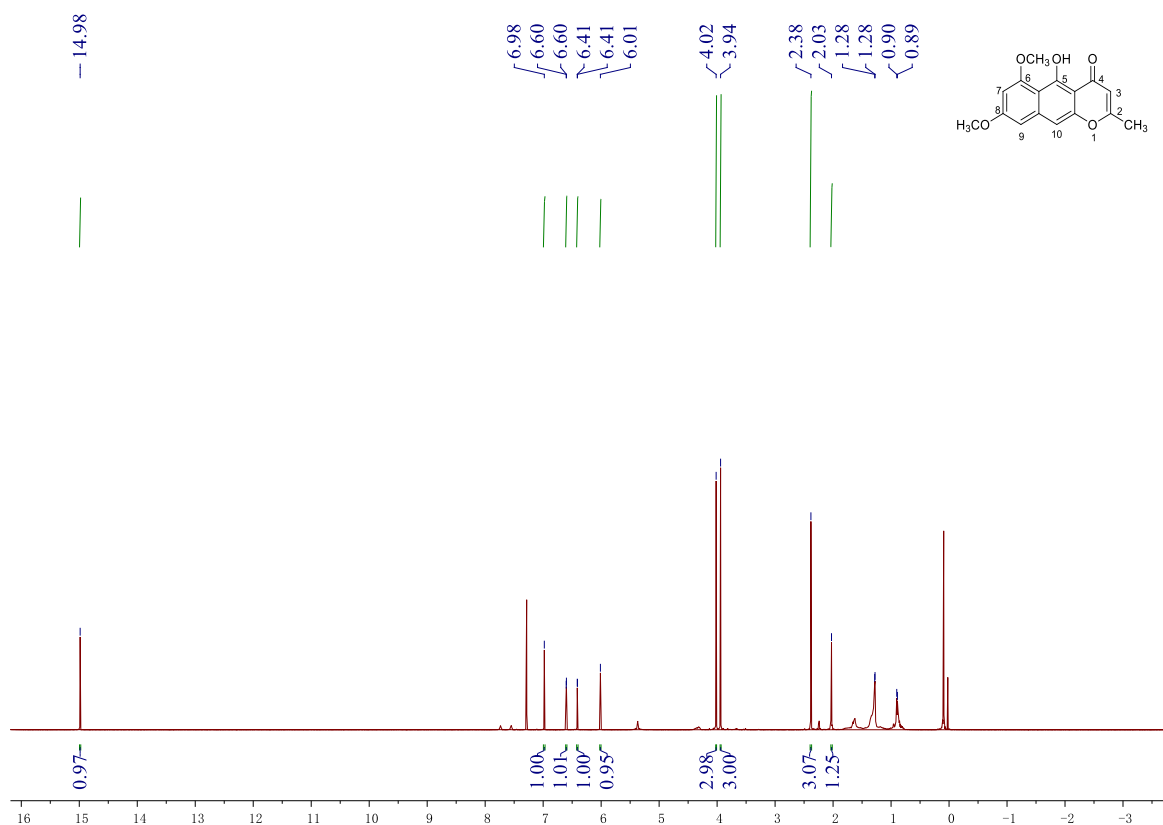

**Figure S6.** <sup>1</sup>H NMR spectrum of compound **1** in CDCl<sub>3</sub>

**Table S3.** Comparison of <sup>1</sup>H NMR spectral data of compound **1** with reference (600 MHz, CDCl<sub>3</sub>)

| Position           | δ <sub>H</sub>                        | δ <sub>H</sub> in reference [9]       |
|--------------------|---------------------------------------|---------------------------------------|
| 2                  | /                                     | /                                     |
| 2-CH <sub>3</sub>  | 2.38 (3H, s)                          | 2.37 (3H, s)                          |
| 3                  | 6.01 (1H, s)                          | 6.00 (1H, s)                          |
| 4                  | /                                     | /                                     |
| 5                  | 14.98 (1H, s, 5-OH)                   | 14.96 (1H, s, 5-OH)                   |
| 6                  | /                                     | /                                     |
| 6-OCH <sub>3</sub> | 4.02 (3H, s)                          | 4.00 (3H, s)                          |
| 7                  | 6.41 (1H, <i>d</i> , <i>J</i> = 2.35) | 6.40 (1H, <i>d</i> , <i>J</i> = 2.20) |
| 8                  | /                                     | /                                     |
| 8-OCH <sub>3</sub> | 3.94 (3H, s)                          | 3.93 (3H, s)                          |
| 9                  | 6.60 (1H, <i>d</i> , <i>J</i> = 2.35) | 6.59 (1H, <i>d</i> , <i>J</i> = 2.20) |
| 10                 | 6.98 (1H, s)                          | 6.97 (1H, s)                          |

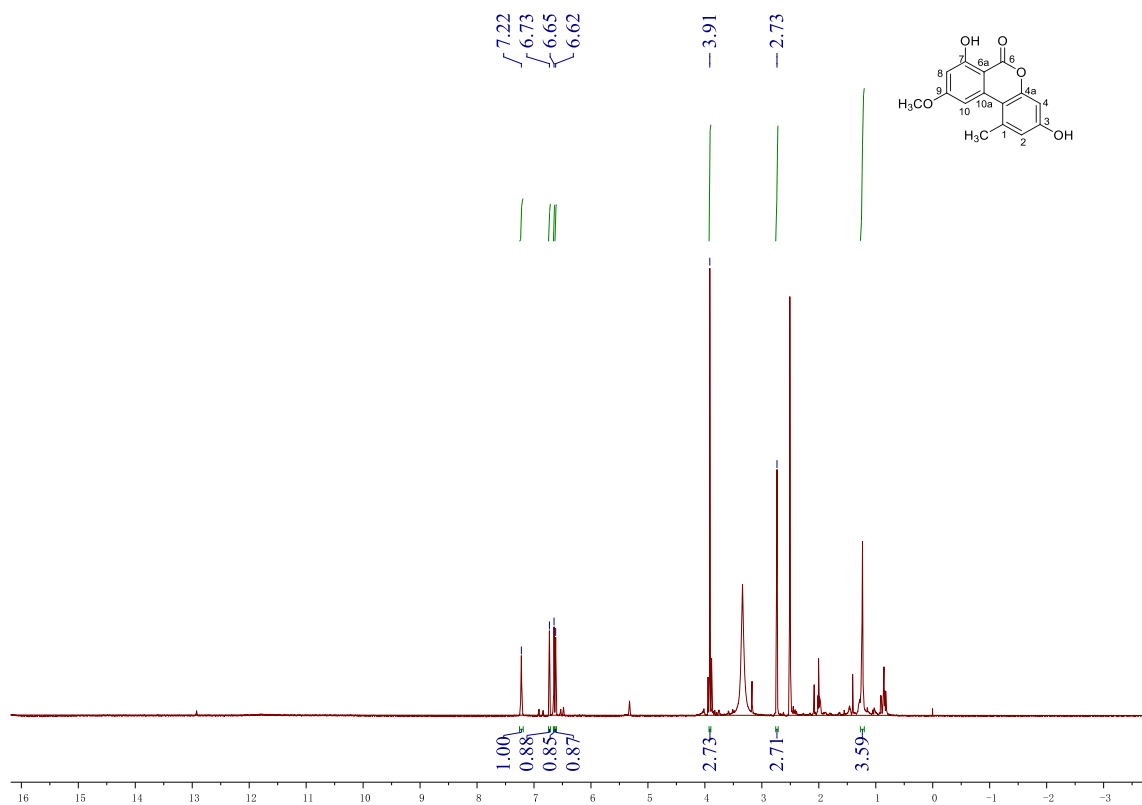

**Figure S7.**  $^1\text{H}$  NMR spectrum of compound **2** in DMSO

**Table S4.** Comparison of  $^1\text{H}$  NMR spectral data of compound **2** with reference (DMSO)

| Position | $\delta_{\text{H}}$                   | $\delta_{\text{H}}$ in reference [10] |
|----------|---------------------------------------|---------------------------------------|
|          | ( <i>I</i> in Hz, 600 MHz)            | ( <i>I</i> in Hz, 500 MHz)            |
| 1        | /                                     | /                                     |
| 2        | 6.73 (1H, <i>d</i> , <i>J</i> = 2.30) | 6.73 (1H, <i>d</i> , <i>J</i> = 2.30) |
| 3        | /                                     | /                                     |
| 4        | 6.65 (1H, <i>d</i> , <i>J</i> = 2.30) | 6.65 (1H, <i>d</i> , <i>J</i> = 2.30) |
| 4a       | /                                     | /                                     |
| 6a       | /                                     | /                                     |
| 7        | /                                     | /                                     |
| 8        | 6.62 (1H, <i>d</i> , <i>J</i> = 1.90) | 6.63 (1H, <i>d</i> , <i>J</i> = 1.90) |
| 9        | /                                     | /                                     |
| 10       | 7.22 (1H, <i>d</i> , <i>J</i> = 1.90) | 7.23 (1H, <i>d</i> , <i>J</i> = 1.90) |
| 10a      | /                                     | /                                     |
| 10b      | /                                     | /                                     |
| 11       | 2.73 (3H, <i>s</i> )                  | 2.74 (3H, <i>s</i> )                  |
| 12       | 3.91 (3H, <i>s</i> )                  | 3.91 (3H, <i>s</i> )                  |

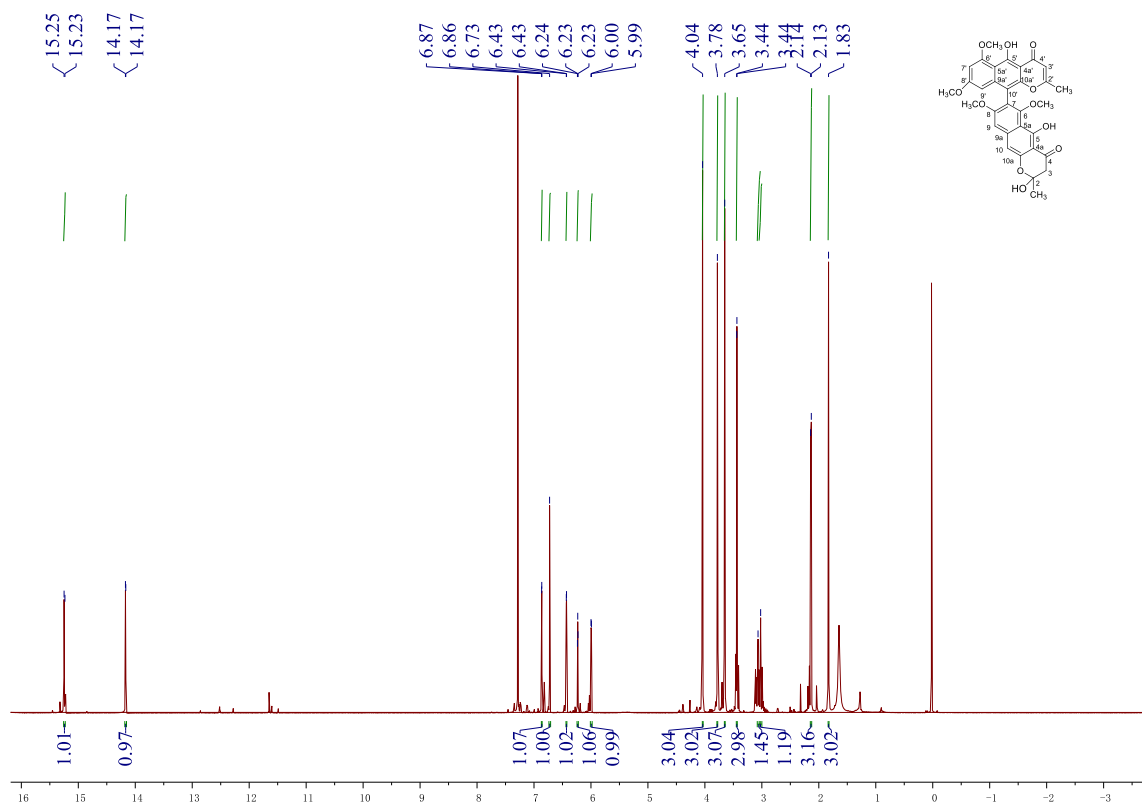

**Figure S8.**  $^1\text{H}$  NMR spectrum of compound **3** in  $\text{CDCl}_3$

**Table S5.** Comparison of  $^1\text{H}$  NMR spectral data of compound **3** with reference ( $\text{CDCl}_3$ )

| Position          | $\delta_{\text{H}}$               | $\delta_{\text{H}}$ in reference [11, 12] |
|-------------------|-----------------------------------|-------------------------------------------|
|                   | (I in Hz, 600 MHz)                | (I in Hz, 60 MHz)                         |
| 2- $\text{CH}_3$  | 1.83 (3H, s)                      | 1.78 (3H, s)                              |
| 2'- $\text{CH}_3$ | 2.13 (3H, s)                      | 2.11 (3H, s)                              |
| 3                 | 3.02/3.07 (1H, s)                 | 3.01 (1H, s)                              |
| 3'                | 6.00 (1H, <i>d</i> , $J = 4.08$ ) | 5.98 (1H, <i>d</i> )                      |
| 5-OH              | 14.17 (1H, s)                     | 14.11 (1H, s)                             |
| 5'-OH             | 15.24 (1H, s)                     | 15.10 (1H, s)                             |
| 6-OMe             | 3.44 (3H, s)                      | 3.42 (3H, s)                              |
| 6'-OMe            | 4.04 (3H, s)                      | 4.00 (3H, s)                              |
| 7'                | 6.43 (1H, <i>d</i> , $J = 2.09$ ) | 6.42 (1H, <i>d</i> , $J = 2.50$ )         |
| 8-OMe             | 3.78 (3H, s)                      | 3.74 (3H, s)                              |
| 8'-OMe            | 3.65 (3H, s)                      | 3.63 (3H, s)                              |
| 9                 | 6.86 (1H, <i>d</i> , $J = 1.41$ ) | 6.84 (1H, <i>d</i> )                      |
| 9'                | 6.23 (1H, <i>d</i> , $J = 2.49$ ) | 6.23 (1H, <i>d</i> , $J = 2.50$ )         |
| 10                | 6.73 (1H, <i>d</i> , $J = 1.41$ ) | 6.70 (1H, <i>d</i> )                      |

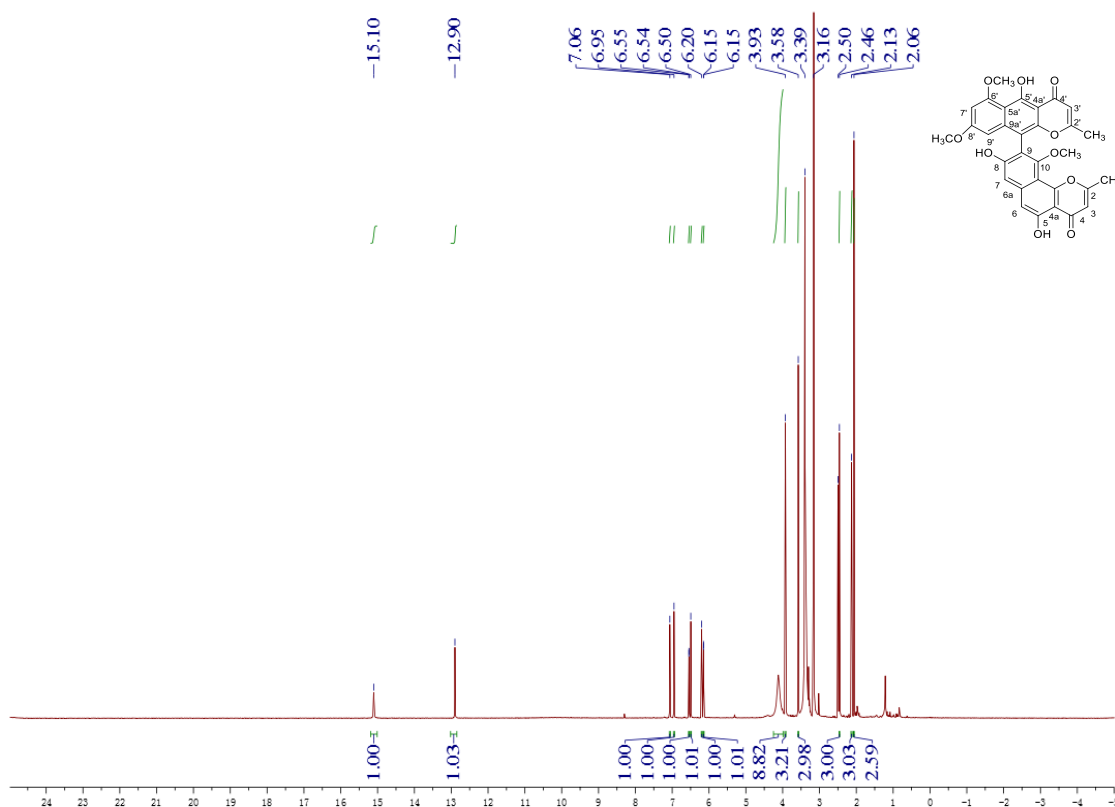

**Figure S9.**  $^1\text{H}$  NMR spectrum of compound **4** in  $\text{CDCl}_3$

**Table S6.** Comparison of  $^1\text{H}$  NMR spectral data of compound **4** with reference ( $\text{CDCl}_3$ )

| Position          | $\delta_{\text{H}}$               | $\delta_{\text{H}}$ in reference [13] |
|-------------------|-----------------------------------|---------------------------------------|
|                   | ( <i>I</i> in Hz, 600 MHz)        | ( <i>I</i> in Hz, 500MHz)             |
| 2- $\text{CH}_3$  | 2.48 (3H, s)                      | 2.46 (3H, s)                          |
| 2'- $\text{CH}_3$ | 2.10 (3H, s)                      | 2.13 (3H, s)                          |
| 3                 | 6.50 (1H, s)                      | 6.50 (1H, s)                          |
| 3'                | 6.20 (1H, s)                      | 6.19 (1H, s)                          |
| 5-OH              | 12.90 (1H, s)                     | 12.90 (1H, s)                         |
| 5'-OH             | 15.10 (1H, s)                     | 15.10 (1H, s)                         |
| 6                 | 6.95 (1H, s)                      | 6.96 (1H, s)                          |
| 7                 | 7.06 (1H, s)                      | 7.07 (1H, s)                          |
| 7'                | 6.55 (1H, <i>d</i> , $J = 2.28$ ) | 6.55 (1H, <i>d</i> , $J = 2.30$ )     |
| 6'-OMe            | 3.93 (3H, s)                      | 3.93 (3H, s)                          |
| 8'-OMe            | 3.58 (3H, s)                      | 3.58 (3H, s)                          |
| 9'                | 6.14 (1H, <i>d</i> , $J = 2.29$ ) | 6.14 (1H, <i>d</i> , $J = 2.30$ )     |
| 10-OMe            | 3.39 (3H, s)                      | 3.39 (3H, s)                          |



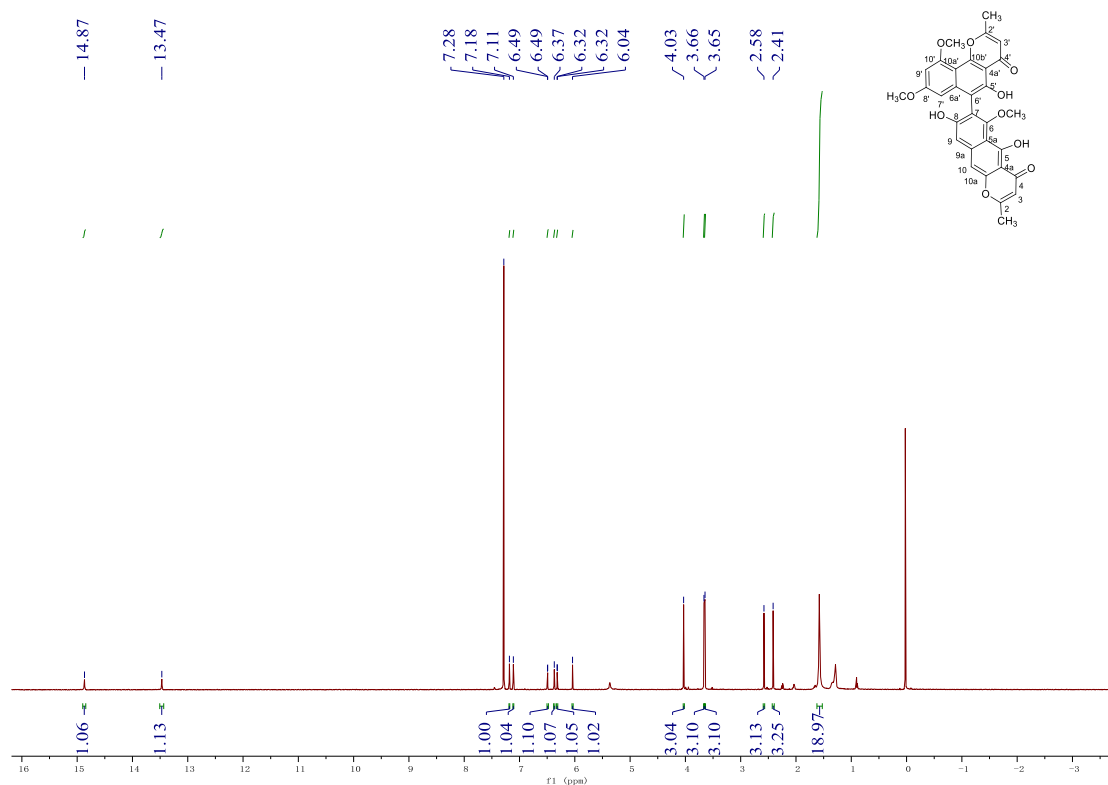

**Figure S10.** <sup>1</sup>H NMR spectrum of compound 5 in CDCl<sub>3</sub>

**Table S7.** Comparison of <sup>1</sup>H NMR spectral data of compound 5 with reference (CDCl<sub>3</sub>)

| Position           | $\delta_{\text{H}}$<br>( <i>I</i> in Hz, 600 MHz) | $\delta_{\text{H}}$ in reference [14]<br>( <i>I</i> in Hz, 500 MHz) |
|--------------------|---------------------------------------------------|---------------------------------------------------------------------|
| 2-CH <sub>3</sub>  | 2.41 (3H, s)                                      | 2.37 (3H, s)                                                        |
| 2'-CH <sub>3</sub> | 2.58 (3H, s)                                      | 2.54 (3H, s)                                                        |
| 3                  | 6.04 (1H, s)                                      | 6.00 (1H, s)                                                        |
| 3'                 | 6.37 (1H, s)                                      | 6.33 (1H, s)                                                        |
| 5-OH               | 14.87 (1H, s)                                     | 14.80 (1H, s)                                                       |
| 5'-OH              | 13.47 (1H, s)                                     | 13.40 (1H, s)                                                       |
| 6-OCH <sub>3</sub> | 3.66 (3H, s)                                      | 3.62 (3H, s)                                                        |
| 7'                 | 6.32 (1H, <i>d</i> , <i>J</i> = 2.21)             | 6.27 (1H, <i>d</i> , <i>J</i> = 2.20)                               |
| 8'-OMe             | 3.65 (3H, s)                                      | 3.60 (3H, s)                                                        |
| 9                  | 7.18 (1H, s)                                      | 7.14 (1H, s)                                                        |
| 9'                 | 6.49 (1H, <i>d</i> , <i>J</i> = 2.21)             | 6.45 (1H, <i>d</i> , <i>J</i> = 2.20)                               |
| 10                 | 7.11 (1H, s)                                      | 7.07 (1H, s)                                                        |
| 10'-OMe            | 4.03 (3H, s)                                      | 3.99 (3H, s)                                                        |

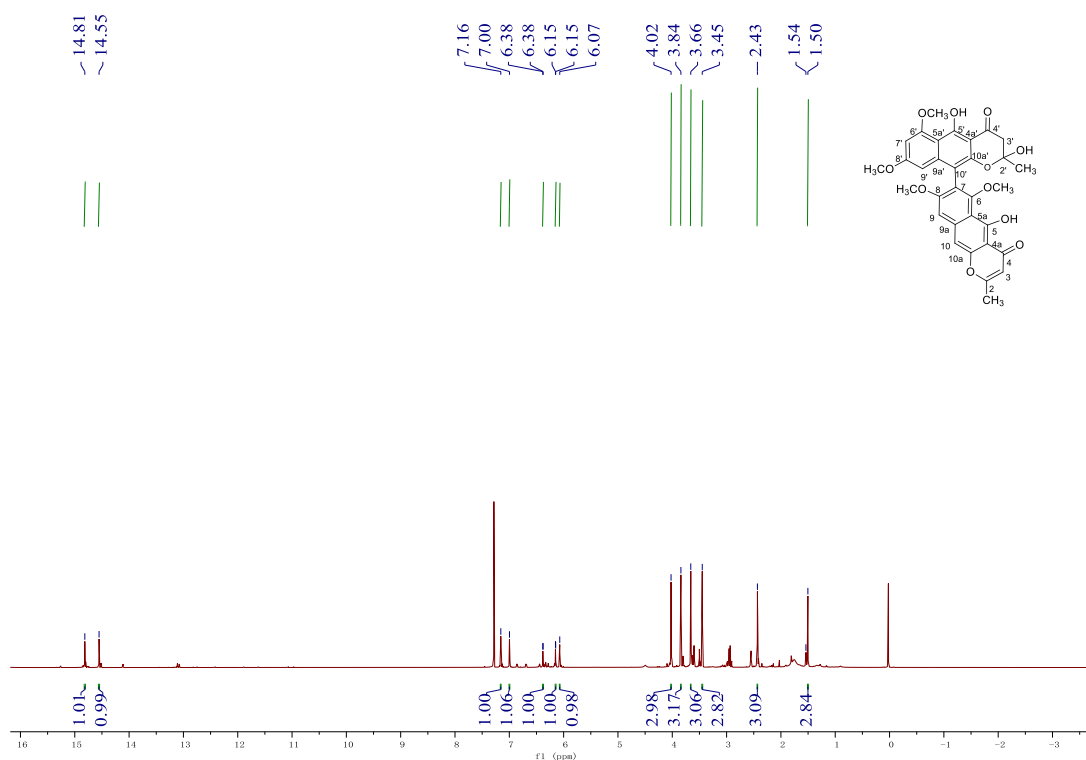

**Figure S11.**  $^1\text{H}$  NMR spectrum of compound **6** in  $\text{CDCl}_3$

**Table S8.** Comparison of  $^1\text{H}$  NMR spectral data of compound **6** with reference ( $\text{CDCl}_3$ )

| Position          | $\delta_{\text{H}}$<br>( <i>I</i> in Hz, 600 MHz) | $\delta_{\text{H}}$ in reference [11]<br>( <i>I</i> in Hz, 60 MHz) |
|-------------------|---------------------------------------------------|--------------------------------------------------------------------|
| 2- $\text{CH}_3$  | 2.43 (3H, s)                                      | 2.39 (3H, s)                                                       |
| 2'- $\text{CH}_3$ | 1.50 (3H, s)                                      | 1.49 (3H, s)                                                       |
| 3                 | 6.07 (1H, s)                                      | 6.01 (1H, s)                                                       |
| 3'                | 3.50 (1H, s)                                      | 2.91 (1H, s)                                                       |
| 5-OH              | 14.81 (1H, s)                                     | 14.70 (1H, s)                                                      |
| 5'-OH             | 14.55 (1H, s)                                     | 14.40 (1H, s)                                                      |
| 6-OMe             | 3.45 (3H, s)                                      | 3.43 (3H, s)                                                       |
| 6'-OMe            | 4.02 (3H, s)                                      | 3.98 (3H, s)                                                       |
| 7'                | 6.38 (1H, <i>d</i> , $J = 2.21$ )                 | 6.35 (1H, <i>d</i> , $J = 2.50$ )                                  |
| 8-OMe             | 3.84 (3H, s)                                      | 3.80 (3H, s)                                                       |
| 8'-OMe            | 3.66 (3H, s)                                      | 3.62 (3H, s)                                                       |
| 9                 | 7.00 (1H, s)                                      | 6.95 (1H, s)                                                       |
| 9'                | 6.15 (1H, <i>d</i> , $J = 2.21$ )                 | 6.13 (1H, <i>d</i> , $J = 2.50$ )                                  |
| 10                | 7.15 (1H, s)                                      | 7.10 (1H, s)                                                       |

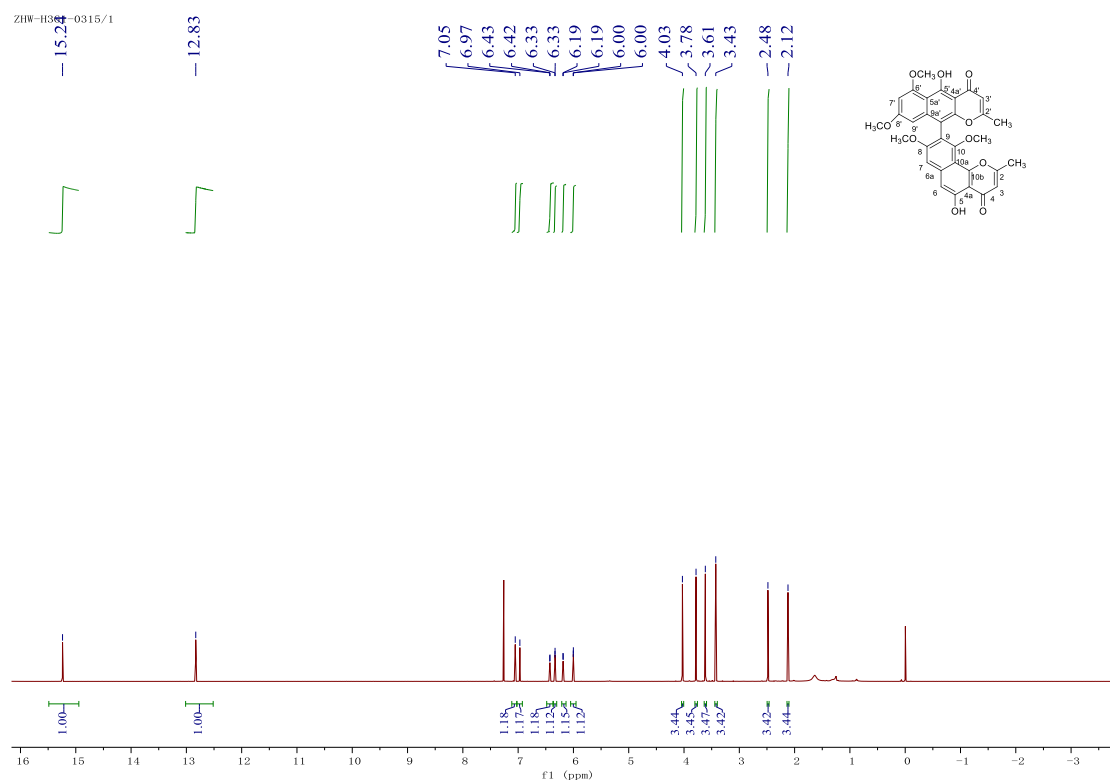

**Figure S12.**  $^1\text{H}$  NMR spectrum of compound **7** in  $\text{CDCl}_3$

**Table S9.** Comparison of  $^1\text{H}$  NMR spectral data of compound **7** with reference ( $\text{CDCl}_3$ )

| Position           | $\delta_{\text{H}}$                   | $\delta_{\text{H}}$ in reference [15] |
|--------------------|---------------------------------------|---------------------------------------|
|                    | ( <i>I</i> in Hz, 600 MHz)            | ( <i>I</i> in Hz, 400 MHz)            |
| 2                  | /                                     | /                                     |
| 2-CH <sub>3</sub>  | 2.48 (3H, s)                          | 2.49 (3H, s)                          |
| 2'                 | /                                     | /                                     |
| 2'-CH <sub>3</sub> | 2.12 (3H, s)                          | 2.13 (3H, s)                          |
| 3                  | 6.33 (1H, s)                          | 6.34 (1H, s)                          |
| 3'                 | 6.00 (1H, s)                          | 6.01 (1H, s)                          |
| 4                  | /                                     | /                                     |
| 4'                 | /                                     | /                                     |
| 4a                 | /                                     | /                                     |
| 4a'                | /                                     | /                                     |
| 5-OH               | 12.83 (1H, s)                         | 12.85 (1H, s)                         |
| 5'-OH              | 15.24 (1H, s)                         | 15.27 (1H, s)                         |
| 5a'                | /                                     | /                                     |
| 6                  | 7.05 (1H, s)                          | 7.06 (1H, s)                          |
| 6'                 | /                                     | /                                     |
| 6'-OMe             | 4.03 (3H, s)                          | 4.04 (3H, s)                          |
| 6a                 | /                                     | /                                     |
| 7                  | 6.97 (1H, s)                          | 6.97 (1H, s)                          |
| 7'                 | 6.43 (1H, <i>d</i> , <i>J</i> = 2.20) | 6.43 (1H, <i>d</i> , <i>J</i> = 2.20) |
| 8                  | /                                     | /                                     |
| 8-OMe              | 3.78 (3H, s)                          | 3.79 (3H, s)                          |
| 8'                 | /                                     | /                                     |
| 8'-OMe             | 3.61 (3H, s)                          | 3.63 (3H, s)                          |
| 9                  | /                                     | /                                     |
| 9'                 | 6.19 (1H, <i>d</i> , <i>J</i> = 2.20) | 6.19 (1H, <i>d</i> , <i>J</i> = 2.20) |
| 9a'                | /                                     | /                                     |
| 10                 | /                                     | /                                     |
| 10-OMe             | 3.43 (3H, s)                          | 3.44 (3H, s)                          |
| 10a                | /                                     | /                                     |
| 10b                | /                                     | /                                     |
| 10'                | /                                     | /                                     |
| 10a'               | /                                     | /                                     |

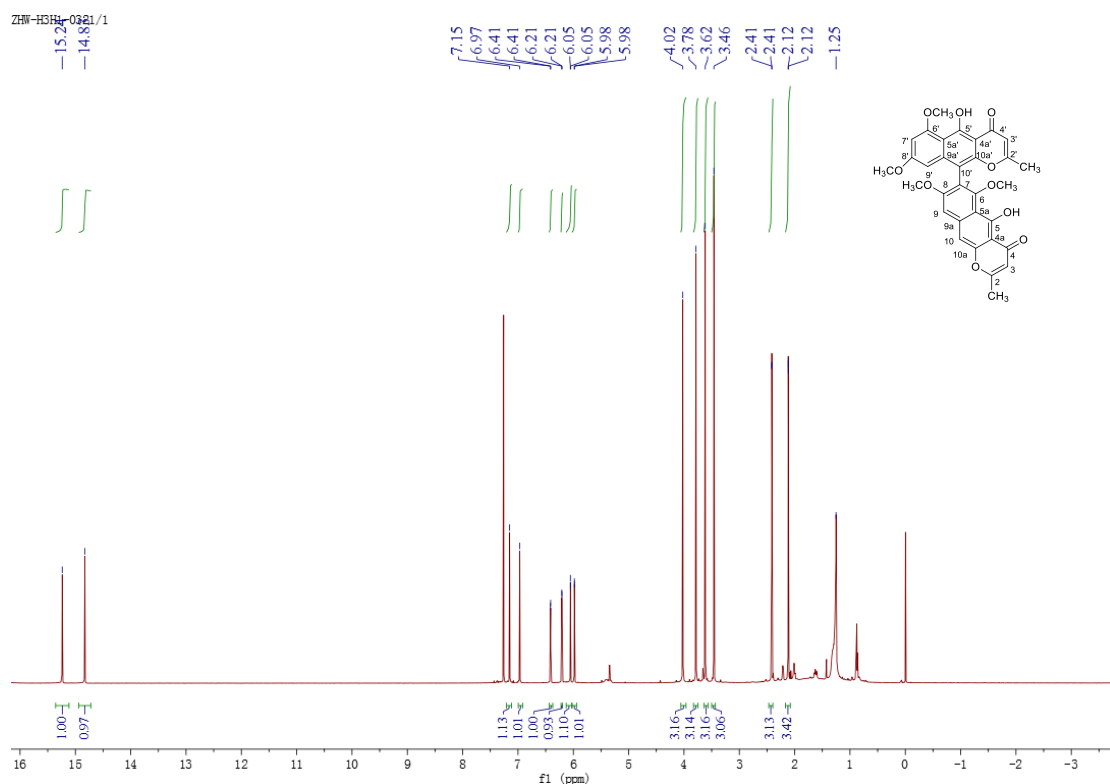

**Figure S13.**  $^1\text{H}$  NMR spectrum of compound **8** in  $\text{CDCl}_3$

**Table S10.** Comparison of  $^1\text{H}$  NMR spectral data of compound **8** with reference ( $\text{CDCl}_3$ )

| Position          | $\delta_{\text{H}}$               | $\delta_{\text{H}}$ in reference [16] |
|-------------------|-----------------------------------|---------------------------------------|
|                   | (J in Hz, 600 MHz)                | (J in Hz, 400 MHz)                    |
| 2- $\text{CH}_3$  | 2.41 (3H, s)                      | 2.42 (3H, s)                          |
| 2'- $\text{CH}_3$ | 2.12 (3H, s)                      | 2.12 (3H, s)                          |
| 3                 | 6.05 (1H, s)                      | 6.06 (1H, s)                          |
| 3'                | 5.98 (1H, s)                      | 5.98 (1H, s)                          |
| 5-OH              | 14.83 (1H, s)                     | 14.84 (1H, s)                         |
| 5'-OH             | 15.24 (1H, s)                     | 15.26 (1H, s)                         |
| 6-OMe             | 3.46 (1H, s)                      | 3.46 (1H, s)                          |
| 6'-OMe            | 4.02 (3H, s)                      | 4.03 (3H, s)                          |
| 7'                | 6.41 (1H, <i>d</i> , $J = 2.27$ ) | 6.41 (1H, <i>d</i> , $J = 2.20$ )     |
| 8-OMe             | 3.78 (3H, s)                      | 3.79 (3H, s)                          |
| 8'-OMe            | 3.62 (3H, s)                      | 3.62 (3H, s)                          |
| 9                 | 6.97 (1H, s)                      | 6.97 (1H, s)                          |
| 9'                | 6.20 (1H, <i>d</i> , $J = 2.27$ ) | 6.20 (1H, <i>d</i> , $J = 2.20$ )     |
| 10                | 7.15 (1H, s)                      | 7.16 (1H, s)                          |
